# Supplementary material for: Diisocyanoarene-linked pentacarbonylvanadate(I−) ions as building blocks in a supramolecular charge-transfer framework assembled through noncovalent π–π and contact ion interactions
Source: Royal Society of Chemistry journal article supplement (doi:10.1039/c2dt30488k), 2012-01-01
Supplement: c2dt30488k.pdf [file c2dt30488k.pdf]

Submitted to *Dalton Trans.*

**Supplementary Information**

**for**

**Diisocyanoarene-linked pentacarbonylvanadate(I-) ions as building  
blocks in a supramolecular charge-transfer framework assembled  
through noncovalent  $\pi$ - $\pi$  and contact ion interactions**

Tiffany R. Maher, John J. Meyers, Jr., Andrew D. Spaeth, Krista R. Lemley,  
and Mikhail V. Barybin\*

*Department of Chemistry, The University of Kansas, 1251 Wescoe Hall Drive, Lawrence, KS  
66045, USA*

\*To whom correspondence should be addressed:

E-mail: mbarybin@ku.edu  
Fax: +1-785-864-5396; Tel: +1-785-864-4106

Submitted to *Dalton Trans.*

## TABLE OF CONTENTS

|                                                                                                                                                                          |             |
|--------------------------------------------------------------------------------------------------------------------------------------------------------------------------|-------------|
| <b>A. Syntheses and Characterization of <b>1a</b>, <b>1b</b>, and <b>2</b></b>                                                                                           | <b>S-3</b>  |
| A1. Procedures, Starting Materials and Equipment                                                                                                                         | S-3         |
| A2. Synthesis of <b>1a</b>                                                                                                                                               | S-4         |
| A3. Synthesis of <b>1b</b> from V(CO) <sub>6</sub>                                                                                                                       | S-4         |
| A4. Cation metathesis converting <b>1a</b> into <b>1b</b>                                                                                                                | S-4         |
| A5. Synthesis of <b>1b</b> from [Cp <sub>2</sub> Co][V(CO) <sub>6</sub> ]                                                                                                | S-5         |
| A6. Synthesis of <b>2</b>                                                                                                                                                | S-5         |
| <b>B. X-ray Crystallographic Characterization of <b>1b</b></b>                                                                                                           | <b>S-6</b>  |
| B1. Experimental                                                                                                                                                         | S-6         |
| Table S1. Crystal data and structure refinement for <b>1b</b>                                                                                                            | S-7         |
| Table S2. Atomic coordinates and isotropic displacement parameters for <b>1b</b>                                                                                         | S-8         |
| Table S3. Bond lengths and for <b>1b</b>                                                                                                                                 | S-9         |
| Table S4. Bond angles for <b>1b</b>                                                                                                                                      | S-10        |
| Table S5. Anisotropic displacement parameters for <b>1b</b>                                                                                                              | S-12        |
| Table S6. Hydrogen coordinates and isotropic displacement parameters for <b>1b</b>                                                                                       | S-13        |
| <b>C. DFT Calculations</b>                                                                                                                                               | <b>S-14</b> |
| C1. Experimental                                                                                                                                                         | S-14        |
| Table S7. Cartesian Coordinates (Å) for the optimized structure of<br>1,4-diisocyanodurene                                                                               | S-14        |
| Table S8. Cartesian Coordinates (Å) for the optimized structure of<br>2,6-dimethylphenyl isocyanide                                                                      | S-15        |
| <b>D. Figures</b>                                                                                                                                                        | <b>S-16</b> |
| Figure S1. Thermal ellipsoid plot for the cobaltocenium cations in <b>1b</b>                                                                                             | S-16        |
| Figure S2. Frontier molecular orbitals for 2,6-dimethylphenyl isocyanide<br>and 1,4-diisocyanodurene                                                                     | S-16        |
| Figure S3. UV-Vis spectra of <b>1a</b> in CH <sub>2</sub> Cl <sub>2</sub> and CH <sub>3</sub> CN                                                                         | S-17        |
| Figure S4. UV-Vis spectra of <b>1b</b> in CH <sub>2</sub> Cl <sub>2</sub> and CH <sub>3</sub> CN                                                                         | S-17        |
| Figure S5. UV-Vis spectra of <b>2</b> in CH <sub>3</sub> CN                                                                                                              | S-17        |
| Figure S6. Electronic absorption spectra of [Cp <sub>2</sub> Co][V(CO) <sub>6</sub> ] in CH <sub>2</sub> Cl <sub>2</sub><br>and CH <sub>3</sub> CN in the visible region | S-18        |
| Figure S7. <sup>51</sup> V NMR spectrum of <b>1a</b> in CD <sub>3</sub> CN at 25 °C                                                                                      | S-18        |
| Figure S8. <sup>51</sup> V NMR spectrum of [Et <sub>4</sub> N][V(CO) <sub>6</sub> ] in CD <sub>3</sub> CN at 25 °C                                                       | S-19        |
| Figure S9. Cyclic voltammogram for <b>1a</b> in CH <sub>3</sub> CN                                                                                                       | S-19        |
| Figure S10. Cyclic voltammogram for <b>1b</b> in CH <sub>3</sub> CN                                                                                                      | S-20        |
| Figure S11. Cyclic voltammogram for <b>2</b> in CH <sub>3</sub> CN                                                                                                       | S-20        |
| <b>E. References</b>                                                                                                                                                     | <b>S-21</b> |

## A. SYNTHESSES AND CHARACTERIZATION OF **1a**, **1b**, and **2**

**A1. General Procedures, Starting Materials and Equipment.** Unless specified otherwise, all operations were performed under an atmosphere of 99.5% argon further purified by passage through columns of activated BASF catalyst and molecular sieves. All connections involving the gas purification systems were made of glass, metal, or other materials impermeable to air. Solutions were transferred via stainless steel needles (cannulas) whenever possible. Standard Schlenk techniques were employed with a double manifold vacuum line. Both CH<sub>3</sub>CN and CD<sub>3</sub>CN, as well as CH<sub>2</sub>Cl<sub>2</sub>, were distilled over CaH<sub>2</sub>. Diethyl ether and THF were distilled from Na/benzophenone. Heptane and pentane were distilled from Na/benzophenone dissolved in a minimum amount of diglyme. DMSO was distilled over P<sub>2</sub>O<sub>5</sub>. Following purification, all solvents, including deuterated solvents, were stored under argon.

Infrared spectra were recorded on a PerkinElmer Spectrum 100 FTIR spectrometer with samples sealed in 0.1 mm NaCl cells or between NaCl disks. NMR samples were analyzed on Bruker Avance 400 or 500 spectrometers. <sup>1</sup>H and <sup>13</sup>C NMR chemical shifts are given with reference to residual solvent resonances relative to SiMe<sub>4</sub>. <sup>51</sup>V NMR chemical shifts are referenced to neat VOCl<sub>3</sub>. A solution of [Et<sub>4</sub>N][V(CO)<sub>6</sub>] in CD<sub>3</sub>CN was used as an external <sup>51</sup>V NMR reference ( $\delta(^{51}\text{V}) = -1955.0$  ppm vs. neat VOCl<sub>3</sub>). UV-Vis spectra were recorded in CH<sub>2</sub>Cl<sub>2</sub> or CH<sub>3</sub>CN at 24 °C using a CARY 100 spectrophotometer.

Cyclic voltammetry (CV) experiments on *ca.* 2×10<sup>-3</sup> M solutions of **1a**, **1b**, and **2** in CH<sub>3</sub>CN were conducted at room temperature using an EPSILON (Bioanalytical Systems Inc., West Lafayette, IN) electrochemical workstation. The electrochemical cell was placed in an argon-filled Vacuum Atmospheres dry-box. Tetrabutylammonium hexafluorophosphate (0.1 M solution in CH<sub>3</sub>CN) was used as a supporting electrolyte. Cyclic voltammograms were recorded at 22 ± 2 °C using a three component system consisting of a platinum working electrode, a platinum wire auxiliary electrode, and a glass encased non-aqueous silver/silver chloride reference electrode. The reference Ag/Ag<sup>+</sup> electrode was monitored with the ferrocenium/ferrocene couple. IR compensation was achieved before each CV run by measuring the uncompensated solution resistance followed by incremental compensation and circuit stability testing. Background cyclic voltammograms of the electrolyte solution were recorded before adding the analytes. The half-wave potentials (*E*<sub>1/2</sub>) were determined as averages of the cathodic and anodic peak potentials of reversible/partially reversible couples and are referenced to the external FcH<sup>+</sup>/FcH couple.<sup>1</sup>

Melting points are uncorrected and were determined for samples in capillary tubes sealed under argon. Elemental analyses were carried out by Desert Analytics (now Columbia Analytical Services), Tucson, Arizona.

Compounds [Et<sub>4</sub>N][V(CO)<sub>6</sub>],<sup>2</sup> [Cp<sub>2</sub>Co][V(CO)<sub>6</sub>],<sup>3</sup> V(CO)<sub>6</sub>,<sup>4</sup> [Cp<sub>2</sub>Co][BF<sub>4</sub>],<sup>5</sup> 1,4-CNC<sub>6</sub>Me<sub>4</sub>NC,<sup>6</sup> and CNXyl (Xyl = 2,6-dimethylphenyl)<sup>7</sup> were prepared according to literature procedures. Complex [Et<sub>4</sub>N][V(CO)<sub>5</sub>(DMSO)], generated in THF by the method of Rehder,<sup>8</sup> was used *in situ*. Other reagents were obtained from commercial sources and used as received.

Submitted to *Dalton Trans.*

**A2. Synthesis of 1a.** A yellow solution of [Et<sub>4</sub>N][V(CO)<sub>6</sub>] (0.3466 g, 0.9924 mmol) and DMSO (0.4 mL, 5.6 mmol) in 80 mL of THF was irradiated using a Hanovia Hg 450 W immersion lamp for 4 hrs at 22 °C with stirring. 1,4-Diisocyanodurene (0.0914g, 0.4962 mmol) dissolved in 20 mL of THF was added to the above solution and the mixture was stirred for 15 hrs. Then, the reaction mixture was concentrated to about 20 mL and stirred for an additional 2-hour period. Pentane (30mL) was added to the reaction flask and the mixture was vigorously stirred for 30 min. An oily dark red precipitate formed, which was washed with toluene (2×20 mL). The toluene washings were carefully removed via cannula. After addition of 50 mL of pentane with stirring, the solution/slurry was filtered. The filter-cake was dissolved in THF. This THF solution was filtered; the filtrate was layered with 150 mL of pentane and stored at -35 °C for 3 hrs. The magenta precipitate was filtered off, washed with pentane (2×10 mL) and dried at 10<sup>-2</sup> torr to provide **1a** (0.2523 g, 0.3052 mmol) in a 62% yield as a free-flowing magenta solid. Mp 82-84 °C. Anal. Calcd. for C<sub>38</sub>H<sub>52</sub>N<sub>4</sub>O<sub>10</sub>V<sub>2</sub>: C, 55.21; H, 6.34; N, 6.78. Found: C, 54.18; H, 6.30; N, 7.14. IR (CH<sub>3</sub>CN): ν<sub>CN</sub> 2061 w, ν<sub>CO</sub> 1951 m, 1831 vs cm<sup>-1</sup>. <sup>1</sup>H NMR (500 MHz, CD<sub>3</sub>CN, 25°C): δ 1.20 (t, 24H, CH<sub>2</sub>CH<sub>3</sub>, <sup>3</sup>J<sub>H-H</sub> = 7 Hz), 2.32 (s, 12H, CH<sub>3</sub>), 3.16 (q, 16H, CH<sub>2</sub>CH<sub>3</sub>, <sup>3</sup>J<sub>H-H</sub> = 7 Hz) ppm. <sup>13</sup>C{<sup>1</sup>H} NMR (125 MHz, CD<sub>3</sub>CN, 25°C): δ 7.7 (CH<sub>2</sub>CH<sub>3</sub>), 16.4 (CH<sub>3</sub>), 53.2 (CH<sub>2</sub>CH<sub>3</sub>) ppm. <sup>51</sup>V NMR (131.6 MHz, CD<sub>3</sub>CN, 25°C): δ -1903.9 ppm; two <sup>13</sup>CO satellite doublets of the relative intensities 4:1 were also observed at -1904.2 ppm with <sup>1</sup>J(<sup>13</sup>C-<sup>51</sup>V) = 116.8 Hz and -1903.9 ppm with <sup>1</sup>J(<sup>13</sup>C-<sup>51</sup>V) = 167.5 Hz, respectively, as well a C<sup>18</sup>O satellite singlet at -1904.0 ppm. UV-Vis (CH<sub>3</sub>CN, λ<sub>max</sub> (ε×10<sup>-3</sup> M<sup>-1</sup> cm<sup>-1</sup>), 24 °C): 489 (1.02) nm.

**A3. Synthesis of 1b from V(CO)<sub>6</sub>.** A colourless solution of diisocyanodurene, 1,4-CNC<sub>6</sub>Me<sub>4</sub>NC (0.0716 g, 0.3886 mmol), in 100 mL of heptane was added to a cold (-70°C) canary yellow solution of hexacarbonylvandium(0) (0.1702 g, 0.7772 mmol) in 200 mL of heptane in the dark with stirring. The reaction mixture was stirred at -70°C for 2 hours while acquiring a pale tangerine colour and then warmed to 0°C. FTIR of the solution/slurry in the ν<sub>CN</sub> and ν<sub>CO</sub> regions indicated essentially complete consumption of the starting materials. Then, an orange-brown solution of cobaltocene (0.1470 g, 0.7772 mmol) in 20 mL of CH<sub>2</sub>Cl<sub>2</sub> was transferred to the reaction mixture in one portion at 0 °C and the mixture was vigorously stirred for 30 min. The resulting dark solid was filtered off, washed with CH<sub>2</sub>Cl<sub>2</sub> (100 mL) and pentane (50 mL), recrystallized from CH<sub>3</sub>CN/Et<sub>2</sub>O, and dried at 10<sup>-2</sup> torr to afford dark violet, nearly black, **1b** (0.3020 g, 0.3198 mmol) in a 73% yield. Compound **1b** decomposes without melting at 138°C. Anal. Calcd. for C<sub>42</sub>H<sub>32</sub>Co<sub>2</sub>N<sub>2</sub>O<sub>10</sub>V<sub>2</sub>: C, 53.41; H, 3.42; N, 2.97. Found: C, 52.89; H, 3.60; N, 3.38. IR (CH<sub>3</sub>CN): ν<sub>CN</sub> 2041 w br, ν<sub>CO</sub> 1926 m br, 1847 s sh, 1839 vs, 1824 m sh cm<sup>-1</sup>. UV-vis (CH<sub>3</sub>CN, λ<sub>max</sub> (ε×10<sup>-3</sup> M<sup>-1</sup> cm<sup>-1</sup>), 24 °C): 484 (3.23) nm.

**A4. Cation metathesis 1a → 1b.** A mixture of cobaltocenium tetrafluoroborate (0.0818 g, 0.2963 mmol) and **1a** (0.1225 g, 0.1482 mmol) was dissolved in 80 mL of CH<sub>2</sub>Cl<sub>2</sub>. The resulting solution was stirred at 22 °C for 48 h to form a dark violet precipitate. After addition of less than 100 mL of heptane, the solid was filtered off, washed with 50 mL of heptane, and dried at 10<sup>-2</sup> torr. Recrystallization from CH<sub>3</sub>CN/Et<sub>2</sub>O (20/150 mL) followed by drying of the product at 10<sup>-2</sup> torr afforded a 53% yield of **1b** (0.0738g 0.0781 mmol),

which was spectroscopically (FTIR,  $^1\text{H}$  NMR) identical to *bona fide* **1b** described above in section A3.

**A5. Synthesis of 1b from  $[\text{Cp}_2\text{Co}][\text{V}(\text{CO})_6]$ .** A solution of  $[\text{Cp}_2\text{Co}][\text{V}(\text{CO})_6]$  (0.1573 g, 0.3855 mmol) and DMSO (0.2 mL, 2.8 mmol) in 80 mL of THF was irradiated using a Hanovia Hg 450 W immersion lamp for 4 h at 22 °C with stirring. Then, the red-orange reaction mixture was concentrated to about 20 mL under vacuum. 1,4-Diisocyanodurene (0.0355g, 0.1927 mmol) dissolved in 20 mL of THF was added to the above concentrated solution. The mixture was stirred for 10 hrs, concentrated to about 10 mL, and stirred for an additional 8-hour period. An oily black precipitate formed. Pentane (30 mL) was added to the reaction flask and the mixture was vigorously stirred for 30 min. Then, 20 mL of toluene was added with stirring, and the solution/slurry was allowed to settle. The solution was carefully removed by cannula, and the residue was washed with toluene (2×20 mL). The resulting dark violet, nearly black solid was washed with 50 mL of pentane and then triturated with an additional 50 mL of pentane. Filtration followed by drying at  $10^{-2}$  torr provided crude **1b** as a dark violet powder. Recrystallization of this solid from  $\text{CH}_3\text{CN}/\text{Et}_2\text{O}$  gave microcrystalline **1b** (0.0572g, 0.0606 mmol) in a 31% yield. The product was spectroscopically (FTIR, NMR) identical to *bona fide* **1b** described above in section A3.

**A6. Synthesis of 2.** A colourless solution of 2,6-dimethylphenyl isocyanide (0.1970 g, 1.5019 mmol), in 70 mL of heptane was added to a yellow-green solution of hexacarbonylvanadium(0) (0.3325 g, 1.5183 mmol) in 100 mL of heptane at room temperature. The reaction mixture rapidly acquired a mustard colour. After stirring for 2 h, an orange-brown solution of cobaltocene (0.3234 g, 1.7100 mmol) was added to the reaction mixture at 22 °C to result in the formation of dark aqua-coloured slurry. This mixture was stirred for 1 hr and then filtered. The filter-cake was washed with heptane (2×30 mL) and recrystallized from THF/ $\text{Et}_2\text{O}$  to afford microcrystalline dark turquoise (bluish green) **2** (0.5425 g, 1.0610 mmol) in two crops in a 71% combined yield. Mp 104-106 °C (dec). Anal. Calcd. for  $\text{C}_{18}\text{H}_{19}\text{CoNO}_5\text{V}$ : C, 56.38; H, 3.75; N, 2.74. Found: C, 56.43; H, 4.01; N, 2.61. IR ( $\text{CH}_3\text{CN}$ ):  $\nu_{\text{CN}}$  2053 w,  $\nu_{\text{CO}}$  1943 m, 1849 s sh, 1837 vs  $\text{cm}^{-1}$ .  $^1\text{H}$  NMR (400 MHz,  $\text{CD}_3\text{CN}$ , 21 °C):  $\delta$  2.36 (s, 6H,  $\text{CH}_3$ ), 5.35 (s, 10H,  $\text{C}_5\text{H}_5$ ), 7.02 (t, 1H, *p*-H,  $^3J_{\text{H-H}} = 8$  Hz), 7.05 (d, 2H, *m*-H,  $^3J_{\text{H-H}} = 8$  Hz) ppm.  $^{13}\text{C}\{^1\text{H}\}$  NMR (100 MHz,  $\text{CD}_3\text{CN}$ , 21°C):  $\delta$  19.1 ( $\text{CH}_3$ ), 88.9 ( $\text{C}_5\text{H}_5$ ), 126.7, 128.6, 134.4 (aromatic C) ppm. UV-vis ( $\text{CH}_3\text{CN}$ ,  $\lambda_{\text{max}}$  ( $\epsilon \times 10^{-3} \text{ M}^{-1} \text{ cm}^{-1}$ ), 24 °C): 483 (1.75) nm.

Submitted to *Dalton Trans.*

## B. X-RAY CRYSTALLOGRAPHIC CHARACTERIZATION OF **1b**

### B1. Experimental

Black needle-shaped crystals of **1b** were grown by layering Et<sub>2</sub>O over a nearly saturated solution of **1b** in CH<sub>3</sub>CN at room temperature and then cooling the sample to +4 °C for several days. All manipulations with the crystals prior to transfer to the goniometer were performed in argon atmosphere. A full hemisphere of diffracted intensities (1850 10-second frames with an  $\omega$  scan width of 0.30°) was measured for a single-domain specimen using graphite-monochromated MoK $\alpha$  radiation ( $\lambda = 0.71073$  Å) on a Bruker SMART APEX CCD Single Crystal Diffraction System.<sup>9</sup> X-rays were provided by a fine-focus sealed x-ray tube operated at 50kV and 30mA. Lattice constants were determined with the Bruker SAINT software package using peak centers for 8659 reflections. A total of 41416 integrated reflection intensities having  $2\theta < 60.20^\circ$  were produced using the Bruker program SAINT.<sup>10</sup> The intensity data were corrected empirically for variable absorption effects using equivalent reflections.<sup>11</sup> The Bruker software package SHELXTL Version 6.10 was used to solve the structure using “direct methods” techniques. All stages of weighted full-matrix least-squares refinement were conducted using  $F_o^2$  data with the SHELXTL software package.<sup>12</sup> A region of the unit cell containing disordered solvent molecules of crystallization (presumably acetonitrile) was modeled using the Squeeze option in PLATON.<sup>13</sup>

The final structural model incorporated anisotropic thermal parameters for all nonhydrogen atoms and isotropic thermal parameters for all hydrogen atoms. The two crystallographically-independent methyl groups in the dianion were included in the structural model as rigid groups (using idealized sp<sup>3</sup>-hybridized geometry and a C-H bond length of 0.98 Å) which were allowed to rotate about their C-C bonds in least-squares refinement cycles. The remaining hydrogen atoms were included in the structural model as idealized atoms (assuming sp<sup>2</sup>-hybridization of the carbon atoms and a C-H bond length of 0.95 Å). The isotropic thermal parameters of all idealized hydrogen atoms were fixed at values 1.2 (non-methyl) or 1.5 (methyl) times the equivalent isotropic thermal parameter of the carbon atom to which they are covalently bonded.

Thermal ellipsoid plots were made using ORTEP III program.<sup>14</sup> The displacement ellipsoids are drawn at the 50% probability level. Crystal data, data collection, solution, and refinement information for **1b** are summarized in Table S1. Tables S2 through S6 contain atomic coordinates, as well as metric and displacement parameters for **1b**.

**Table S1.** Crystal data and structure refinement for **1b**.

|                                   |                                                                                               |             |
|-----------------------------------|-----------------------------------------------------------------------------------------------|-------------|
| Empirical formula                 | C <sub>42</sub> H <sub>32</sub> Co <sub>2</sub> N <sub>2</sub> O <sub>10</sub> V <sub>2</sub> |             |
| Formula weight                    | 944.44                                                                                        |             |
| Temperature                       | 100(2) K                                                                                      |             |
| Wavelength                        | 0.71073 Å                                                                                     |             |
| Crystal system                    | Tetragonal                                                                                    |             |
| Space group                       | P4 <sub>2</sub> /n – C <sub>4h</sub> <sup>4</sup> (No. 86)                                    |             |
| Unit cell dimensions              | <b>a</b> = 23.719 (1) Å                                                                       | α = 90.000° |
|                                   | <b>b</b> = 23.719 (1) Å                                                                       | β = 90.000° |
|                                   | <b>c</b> = 7.1617(8) Å                                                                        | γ = 90.000° |
| Volume                            | 4029.2(6) Å <sup>3</sup>                                                                      |             |
| Z                                 | 4 molecular units                                                                             |             |
| Density (calculated)              | 1.557 Mg/m <sup>3</sup>                                                                       |             |
| Absorption coefficient            | 1.319 mm <sup>-1</sup>                                                                        |             |
| F(000)                            | 1912                                                                                          |             |
| Crystal size                      | 0.46 x 0.16 x 0.10 mm <sup>3</sup>                                                            |             |
| Theta range for data collection   | 2.43° to 30.10°                                                                               |             |
| Index ranges                      | -33 ≤ h ≤ 33, -33 ≤ k ≤ 33, -10 ≤ l ≤ 9                                                       |             |
| Reflections collected             | 41416                                                                                         |             |
| Independent reflections           | 5907 [R <sub>int</sub> = 0.051]                                                               |             |
| Completeness to theta = 30.10°    | 99.6 %                                                                                        |             |
| Absorption correction             | SADABS                                                                                        |             |
| Max. and min. transmission        | 1.000 and 0.746                                                                               |             |
| Refinement method                 | Full-matrix least-squares on F <sup>2</sup>                                                   |             |
| Data / restraints / parameters    | 5907 / 0 / 264                                                                                |             |
| Goodness-of-fit on F <sup>2</sup> | 1.069                                                                                         |             |
| Final R indices [I > 2σ(I)]       | R <sub>1</sub> = 0.050, wR <sub>2</sub> = 0.120                                               |             |
| R indices (all data)              | R <sub>1</sub> = 0.070, wR <sub>2</sub> = 0.129                                               |             |
| Largest diff. peak and hole       | 1.25 and -0.28 e <sup>-</sup> /Å <sup>3</sup>                                                 |             |

Submitted to *Dalton Trans.*

**Table S2.** Atomic coordinates and equivalent isotropic displacement parameters for **1b**.  
U(eq) is defined as one third of the trace of the orthogonalized  $U_{ij}$  tensor.

|       | x        | y       | z        | U(eq) |
|-------|----------|---------|----------|-------|
| V     | 174(1)   | 6565(1) | -1147(1) | 24(1) |
| O(10) | -972(1)  | 5945(1) | -1053(3) | 51(1) |
| O(11) | 405(1)   | 6044(1) | -5060(2) | 37(1) |
| O(12) | -340(1)  | 7588(1) | -3258(3) | 47(1) |
| O(13) | -92(1)   | 7075(1) | 2749(2)  | 37(1) |
| O(14) | 603(1)   | 5490(1) | 881(3)   | 52(1) |
| N(1)  | 1414(1)  | 7098(1) | -1177(3) | 31(1) |
| C(1)  | 957(1)   | 6908(1) | -1158(3) | 29(1) |
| C(2)  | 1962(1)  | 7302(1) | -1196(3) | 25(1) |
| C(3)  | 2405(1)  | 6911(1) | -1193(3) | 25(1) |
| C(4)  | 2043(1)  | 7887(1) | -1214(3) | 25(1) |
| C(5)  | 2292(1)  | 6284(1) | -1170(4) | 36(1) |
| C(6)  | 1554(1)  | 8286(1) | -1231(4) | 35(1) |
| C(10) | -543(1)  | 6191(1) | -1113(3) | 34(1) |
| C(11) | 331(1)   | 6236(1) | -3613(3) | 28(1) |
| C(12) | -141(1)  | 7216(1) | -2453(3) | 32(1) |
| C(13) | 15(1)    | 6889(1) | 1315(3)  | 29(1) |
| C(14) | 462(1)   | 5894(1) | 131(3)   | 33(1) |
| Co    | -693(1)  | 8565(1) | 932(1)   | 28(1) |
| C(21) | -215(1)  | 9200(1) | 1954(5)  | 45(1) |
| C(22) | 17(1)    | 8668(1) | 2462(4)  | 44(1) |
| C(23) | 140(1)   | 8376(1) | 785(4)   | 34(1) |
| C(24) | -14(1)   | 8728(1) | -724(4)  | 34(1) |
| C(25) | -235(1)  | 9231(1) | 0(4)     | 40(1) |
| C(31) | -1459(1) | 8600(1) | 2193(4)  | 43(1) |
| C(32) | -1210(1) | 8060(1) | 2437(4)  | 44(1) |
| C(33) | -1115(1) | 7829(1) | 640(4)   | 37(1) |
| C(34) | -1304(1) | 8223(1) | -713(4)  | 36(1) |
| C(35) | -1514(1) | 8701(1) | 245(4)   | 38(1) |



Submitted to *Dalton Trans.*

**Table S3.** Bond lengths [Å] for **1b**.

|             |          |             |          |
|-------------|----------|-------------|----------|
| V-C(10)     | 1.919(3) | Co-C(22)    | 2.022(3) |
| V-C(12)     | 1.953(3) | Co-C(32)    | 2.025(3) |
| V-C(14)     | 1.959(3) | Co-C(33)    | 2.025(3) |
| V-C(13)     | 1.960(3) | Co-C(23)    | 2.028(2) |
| V-C(11)     | 1.967(3) | Co-C(25)    | 2.030(3) |
| V-C(1)      | 2.027(2) | Co-C(31)    | 2.031(3) |
| O(10)-C(10) | 1.174(3) | Co-C(35)    | 2.034(3) |
| O(11)-C(11) | 1.145(3) | Co-C(24)    | 2.036(2) |
| O(12)-C(12) | 1.155(3) | Co-C(34)    | 2.037(3) |
| O(13)-C(13) | 1.146(3) | C(21)-C(25) | 1.402(4) |
| O(14)-C(14) | 1.148(3) | C(21)-C(22) | 1.425(4) |
| N(1)-C(1)   | 1.173(3) | C(22)-C(23) | 1.416(4) |
| N(1)-C(2)   | 1.388(3) | C(23)-C(24) | 1.414(4) |
| C(2)-C(4)   | 1.401(3) | C(24)-C(25) | 1.403(4) |
| C(2)-C(3)   | 1.401(3) | C(31)-C(35) | 1.421(4) |
| C(3)-C(4)#1 | 1.394(3) | C(31)-C(32) | 1.422(4) |
| C(3)-C(5)   | 1.512(3) | C(32)-C(33) | 1.417(4) |
| C(4)-C(3)#1 | 1.394(3) | C(33)-C(34) | 1.419(4) |
| C(4)-C(6)   | 1.498(3) | C(34)-C(35) | 1.416(4) |
| Co-C(21)    | 2.022(3) |             |          |

Symmetry transformations used to generate equivalent atoms: #1  $-x+1/2, -y+3/2, z$ .

Submitted to *Dalton Trans.*

**Table S4.** Bond angles [°] for **1b**.

|                  |            |                |            |
|------------------|------------|----------------|------------|
| C(10)-V-C(12)    | 91.87(11)  | C(22)-Co-C(32) | 106.65(13) |
| C(10)-V-C(14)    | 85.79(11)  | C(21)-Co-C(33) | 163.23(13) |
| C(12)-V-C(14)    | 177.55(11) | C(22)-Co-C(33) | 124.83(12) |
| C(10)-V-C(13)    | 89.99(10)  | C(32)-Co-C(33) | 40.96(12)  |
| C(12)-V-C(13)    | 92.71(10)  | C(21)-Co-C(23) | 68.79(11)  |
| C(14)-V-C(13)    | 88.02(10)  | C(22)-Co-C(23) | 40.94(11)  |
| C(10)-V-C(11)    | 89.71(10)  | C(32)-Co-C(23) | 119.11(11) |
| C(12)-V-C(11)    | 87.53(10)  | C(33)-Co-C(23) | 106.59(10) |
| C(14)-V-C(11)    | 91.73(10)  | C(21)-Co-C(25) | 40.49(13)  |
| C(13)-V-C(11)    | 179.63(10) | C(22)-Co-C(25) | 68.89(12)  |
| C(10)-V-C(1)     | 176.02(11) | C(32)-Co-C(25) | 163.61(12) |
| C(12)-V-C(1)     | 91.84(10)  | C(33)-Co-C(25) | 154.46(12) |
| C(14)-V-C(1)     | 90.49(10)  | C(23)-Co-C(25) | 68.55(10)  |
| C(13)-V-C(1)     | 91.27(10)  | C(21)-Co-C(31) | 108.05(12) |
| C(11)-V-C(1)     | 89.01(9)   | C(22)-Co-C(31) | 119.91(13) |
| C(1)-N(1)-C(2)   | 177.7(3)   | C(32)-Co-C(31) | 41.04(11)  |
| N(1)-C(1)-V      | 178.9(2)   | C(33)-Co-C(31) | 68.81(11)  |
| N(1)-C(2)-C(4)   | 118.2(2)   | C(23)-Co-C(31) | 154.63(12) |
| N(1)-C(2)-C(3)   | 118.2(2)   | C(25)-Co-C(31) | 126.36(12) |
| C(4)-C(2)-C(3)   | 123.56(19) | C(21)-Co-C(35) | 120.40(11) |
| C(4)#1-C(3)-C(2) | 118.4(2)   | C(22)-Co-C(35) | 155.31(12) |
| C(4)#1-C(3)-C(5) | 120.3(2)   | C(32)-Co-C(35) | 69.06(12)  |
| C(2)-C(3)-C(5)   | 121.2(2)   | C(33)-Co-C(35) | 68.77(11)  |
| C(3)#1-C(4)-C(2) | 118.0(2)   | C(23)-Co-C(35) | 162.68(12) |
| C(3)#1-C(4)-C(6) | 120.6(2)   | C(25)-Co-C(35) | 108.02(11) |
| C(2)-C(4)-C(6)   | 121.4(2)   | C(31)-Co-C(35) | 40.93(12)  |
| O(10)-C(10)-V    | 177.4(2)   | C(21)-Co-C(24) | 68.08(12)  |
| O(11)-C(11)-V    | 177.8(2)   | C(22)-Co-C(24) | 68.60(12)  |
| O(12)-C(12)-V    | 177.6(2)   | C(32)-Co-C(24) | 154.28(11) |
| O(13)-C(13)-V    | 178.2(2)   | C(33)-Co-C(24) | 119.65(11) |
| O(14)-C(14)-V    | 176.5(2)   | C(23)-Co-C(24) | 40.71(10)  |
| C(21)-Co-C(22)   | 41.28(12)  | C(25)-Co-C(24) | 40.36(11)  |
| C(21)-Co-C(32)   | 125.98(14) | C(31)-Co-C(24) | 163.42(11) |

Submitted to *Dalton Trans.*

|                   |            |                   |           |
|-------------------|------------|-------------------|-----------|
| C(35)-Co-C(24)    | 125.85(11) | C(25)-C(24)-Co    | 69.57(15) |
| C(21)-Co-C(34)    | 154.83(12) | C(23)-C(24)-Co    | 69.31(14) |
| C(22)-Co-C(34)    | 162.41(12) | C(21)-C(25)-C(24) | 108.2(2)  |
| C(32)-Co-C(34)    | 68.97(12)  | C(21)-C(25)-Co    | 69.45(16) |
| C(33)-Co-C(34)    | 40.90(11)  | C(24)-C(25)-Co    | 70.07(14) |
| C(23)-Co-C(34)    | 125.07(11) | C(35)-C(31)-C(32) | 108.1(2)  |
| C(25)-Co-C(34)    | 120.04(11) | C(35)-C(31)-Co    | 69.64(15) |
| C(31)-Co-C(34)    | 68.71(12)  | C(32)-C(31)-Co    | 69.27(15) |
| C(35)-Co-C(34)    | 40.70(11)  | C(33)-C(32)-C(31) | 107.7(3)  |
| C(24)-Co-C(34)    | 107.52(11) | C(33)-C(32)-Co    | 69.52(15) |
| C(25)-C(21)-C(22) | 108.3(2)   | C(31)-C(32)-Co    | 69.69(15) |
| C(25)-C(21)-Co    | 70.06(15)  | C(32)-C(33)-C(34) | 108.3(2)  |
| C(22)-C(21)-Co    | 69.38(16)  | C(32)-C(33)-Co    | 69.52(16) |
| C(23)-C(22)-C(21) | 107.2(3)   | C(34)-C(33)-Co    | 69.99(15) |
| C(23)-C(22)-Co    | 69.73(15)  | C(35)-C(34)-C(33) | 107.9(3)  |
| C(21)-C(22)-Co    | 69.34(16)  | C(35)-C(34)-Co    | 69.53(15) |
| C(24)-C(23)-C(22) | 107.8(2)   | C(33)-C(34)-Co    | 69.11(15) |
| C(24)-C(23)-Co    | 69.97(14)  | C(34)-C(35)-C(31) | 108.0(2)  |
| C(22)-C(23)-Co    | 69.33(14)  | C(34)-C(35)-Co    | 69.77(14) |
| C(25)-C(24)-C(23) | 108.5(2)   | C(31)-C(35)-Co    | 69.42(14) |

---

Symmetry transformations used to generate equivalent atoms: #1 -x+1/2,-y+3/2,z.

**Table S5.** Anisotropic displacement parameters ( $\text{\AA}^2 \times 10^3$ ) for **1b**. The anisotropic displacement factor exponent takes the form:  $-2\pi^2 [ h^2 a^{*2}U_{11} + \dots + 2 h k a^* b^* U_{12} ]$ .

|       | U <sub>11</sub> | U <sub>22</sub> | U <sub>33</sub> | U <sub>23</sub> | U <sub>13</sub> | U <sub>12</sub> |
|-------|-----------------|-----------------|-----------------|-----------------|-----------------|-----------------|
| V     | 22(1)           | 26(1)           | 25(1)           | 0(1)            | -1(1)           | 0(1)            |
| O(10) | 40(1)           | 75(2)           | 38(1)           | 0(1)            | -3(1)           | -23(1)          |
| O(11) | 44(1)           | 35(1)           | 31(1)           | -2(1)           | 2(1)            | 5(1)            |
| O(12) | 71(1)           | 36(1)           | 34(1)           | -3(1)           | -7(1)           | 18(1)           |
| O(13) | 46(1)           | 38(1)           | 27(1)           | -2(1)           | 0(1)            | 4(1)            |
| O(14) | 75(2)           | 48(1)           | 34(1)           | 7(1)            | 2(1)            | 23(1)           |
| N(1)  | 27(1)           | 40(1)           | 26(1)           | -2(1)           | 1(1)            | -7(1)           |
| C(1)  | 29(1)           | 32(1)           | 25(1)           | -2(1)           | 0(1)            | 0(1)            |
| C(2)  | 23(1)           | 35(1)           | 17(1)           | -2(1)           | 2(1)            | -7(1)           |
| C(3)  | 29(1)           | 31(1)           | 15(1)           | -1(1)           | 0(1)            | -7(1)           |
| C(4)  | 26(1)           | 33(1)           | 15(1)           | 0(1)            | 1(1)            | -1(1)           |
| C(5)  | 41(1)           | 29(1)           | 37(1)           | -3(1)           | -1(1)           | -7(1)           |
| C(6)  | 32(1)           | 40(1)           | 34(1)           | -1(1)           | 3(1)            | 3(1)            |
| C(10) | 34(1)           | 44(1)           | 25(1)           | 0(1)            | -2(1)           | -4(1)           |
| C(11) | 25(1)           | 26(1)           | 33(1)           | 3(1)            | -3(1)           | 0(1)            |
| C(12) | 38(1)           | 32(1)           | 26(1)           | -7(1)           | -1(1)           | 2(1)            |
| C(13) | 26(1)           | 28(1)           | 32(1)           | 5(1)            | -4(1)           | -1(1)           |
| C(14) | 36(1)           | 34(1)           | 28(1)           | -1(1)           | 4(1)            | 4(1)            |
| Co    | 26(1)           | 26(1)           | 31(1)           | 2(1)            | 3(1)            | 5(1)            |
| C(21) | 39(1)           | 41(2)           | 56(2)           | -18(1)          | 3(1)            | -2(1)           |
| C(22) | 36(1)           | 59(2)           | 37(2)           | 0(1)            | -7(1)           | 0(1)            |
| C(23) | 22(1)           | 32(1)           | 48(2)           | 3(1)            | 3(1)            | 3(1)            |
| C(24) | 29(1)           | 36(1)           | 39(1)           | 3(1)            | 7(1)            | -4(1)           |
| C(25) | 34(1)           | 28(1)           | 58(2)           | 6(1)            | 0(1)            | -2(1)           |
| C(31) | 30(1)           | 49(2)           | 50(2)           | -5(1)           | 11(1)           | 5(1)            |
| C(32) | 35(1)           | 47(2)           | 49(2)           | 15(1)           | 12(1)           | 2(1)            |
| C(33) | 32(1)           | 29(1)           | 52(2)           | 5(1)            | 6(1)            | 1(1)            |
| C(34) | 33(1)           | 34(1)           | 40(1)           | 2(1)            | -3(1)           | -1(1)           |
| C(35) | 28(1)           | 35(1)           | 53(2)           | 3(1)            | -2(1)           | 5(1)            |

Submitted to *Dalton Trans.*

**Table S6.** Hydrogen coordinates ( $\times 10^4$ ) and isotropic displacement parameters ( $\text{\AA}^2 \times 10^3$ ) for **1b**.

|       | x     | y    | z     | U(eq) |
|-------|-------|------|-------|-------|
| H(5A) | 2493  | 6111 | -120  | 53    |
| H(5B) | 2423  | 6116 | -2343 | 53    |
| H(5C) | 1886  | 6217 | -1031 | 53    |
| H(6A) | 1613  | 8572 | -2201 | 53    |
| H(6B) | 1523  | 8471 | -11   | 53    |
| H(6C) | 1206  | 8078 | -1493 | 53    |
| H(21) | -336  | 9486 | 2795  | 54    |
| H(22) | 77    | 8533 | 3695  | 53    |
| H(23) | 298   | 8009 | 691   | 41    |
| H(24) | 25    | 8639 | -2010 | 41    |
| H(25) | -374  | 9540 | -710  | 48    |
| H(31) | -1569 | 8850 | 3162  | 51    |
| H(32) | -1123 | 7886 | 3596  | 52    |
| H(33) | -953  | 7470 | 385   | 45    |
| H(34) | -1291 | 8175 | -2030 | 43    |
| H(35) | -1664 | 9031 | -316  | 46    |

Submitted to *Dalton Trans.*

## C. DFT CALCULATIONS

### C1. Experimental

Density Functional Theory (DFT) calculations on 1,4-diisocyanodurene and 2,6-dimethylphenyl isocyanide were performed using the Orca (v.2.8.0) program.<sup>15</sup> Geometric optimizations were performed spin-restricted using the BP86 functional<sup>16</sup> with a TZVP basis set.<sup>17</sup> The resolution of identity approximation (RI) was used along with the SV/J auxiliary basis set.<sup>18</sup> Single point energy calculations were performed using the B3LYP functional<sup>19</sup> with a TZVP basis set to obtain orbital energies. Orbital pictures were produced using the Molekel (v.5.4.0.8) program with isodensity values set at  $\pm 0.05$ .<sup>20</sup> The following tables contain Cartesian coordinates for the optimized compounds.

**Table S7.** Cartesian coordinates (Å) for the optimized structure of 1,4-diisocyanodurene.

| Atom | x         | y         | z         |
|------|-----------|-----------|-----------|
| C    | -0.017504 | 0.055012  | 0.000010  |
| C    | 0.796565  | 1.323120  | 0.000003  |
| C    | 2.202156  | 1.320808  | -0.000104 |
| C    | 2.870100  | 2.569195  | -0.000096 |
| C    | 2.200524  | 3.816708  | 0.000002  |
| C    | 0.794940  | 3.812583  | 0.000106  |
| C    | 0.131384  | 2.567420  | 0.000098  |
| N    | -1.255058 | 2.566515  | 0.000195  |
| C    | -2.439848 | 2.565748  | 0.000276  |
| C    | -0.020763 | 5.079635  | 0.000213  |
| H    | 0.609147  | 5.973938  | 0.000295  |
| H    | -0.678109 | 5.124537  | -0.881447 |
| H    | -0.678123 | 5.124381  | 0.881868  |
| C    | 2.975421  | 5.111849  | -0.000004 |
| H    | 4.055348  | 4.934823  | -0.000109 |
| H    | 2.734384  | 5.718217  | -0.886221 |
| H    | 2.734544  | 5.718132  | 0.886315  |
| N    | 4.258686  | 2.570101  | -0.000187 |
| C    | 5.443031  | 2.570868  | -0.000266 |
| C    | 2.978738  | 0.026681  | -0.000221 |
| H    | 4.058431  | 0.205116  | -0.000309 |
| H    | 2.738645  | -0.579988 | 0.886044  |
| H    | 2.738488  | -0.579921 | -0.886488 |
| H    | 0.613569  | -0.838479 | 0.000017  |
| H    | -0.674798 | 0.009342  | 0.881664  |
| H    | -0.674791 | 0.009330  | -0.881650 |

Submitted to *Dalton Trans.*

**Table S8.** Cartesian coordinates (Å) for the optimized structure of 2,6-dimethylphenyl isocyanide.

| Atom | x         | y         | z         |
|------|-----------|-----------|-----------|
| C    | -0.010178 | 0.007214  | 0.000002  |
| C    | -0.740912 | 1.325988  | 0.000109  |
| C    | -2.140892 | 1.356911  | 0.000209  |
| C    | -2.838302 | 2.565488  | 0.000310  |
| C    | -2.142467 | 3.774974  | 0.000309  |
| C    | -0.742529 | 3.807714  | 0.000211  |
| C    | -0.060209 | 2.567295  | 0.000112  |
| N    | 1.328739  | 2.568195  | 0.000013  |
| C    | 2.512577  | 2.568954  | -0.000071 |
| C    | -0.013510 | 5.127437  | 0.000214  |
| H    | 1.074486  | 5.001018  | 0.000120  |
| H    | -0.287395 | 5.721067  | -0.885255 |
| H    | -0.287252 | 5.720985  | 0.885782  |
| H    | -2.690854 | 4.719191  | 0.000387  |
| H    | -3.929694 | 2.564771  | 0.000389  |
| H    | -2.688058 | 0.411982  | 0.000209  |
| H    | 1.077650  | 0.135049  | -0.000072 |
| H    | -0.283161 | -0.586763 | 0.885516  |
| H    | -0.283289 | -0.586690 | -0.885522 |

### D. FIGURES

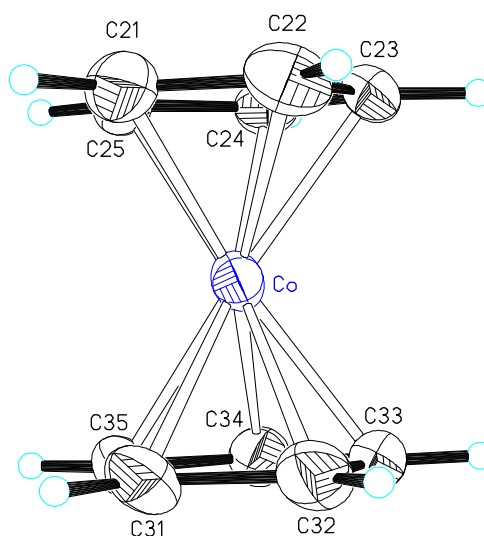

**Figure S1.** Thermal ellipsoid plot for the cobaltocenium cations in **1b** (all  $[\text{Cp}_2\text{Co}]^+$  cations are mutually symmetry equivalent).

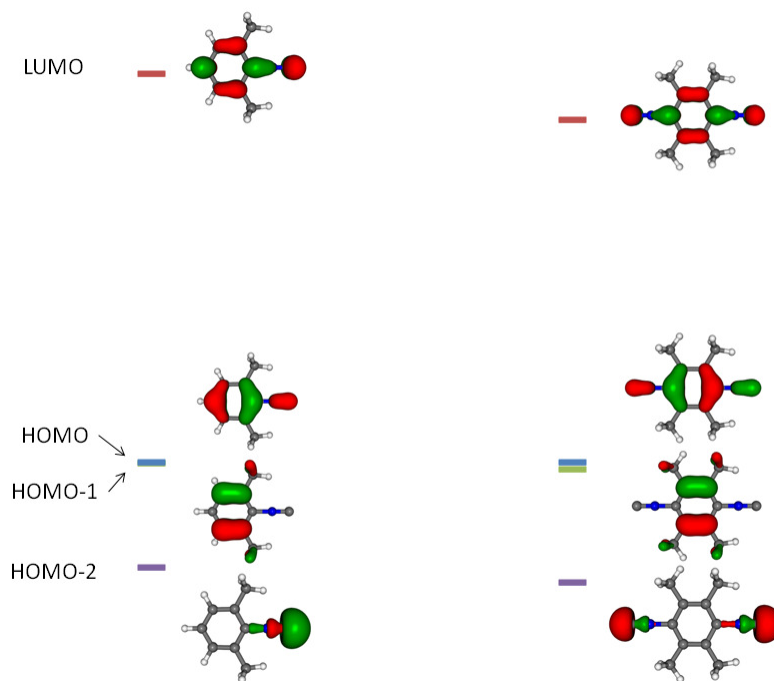

**Figure S2.** Frontier molecular orbitals for 2,6-dimethylphenyl isocyanide (left) and 1,4-diisocyanodurene (right).



Submitted to *Dalton Trans.*

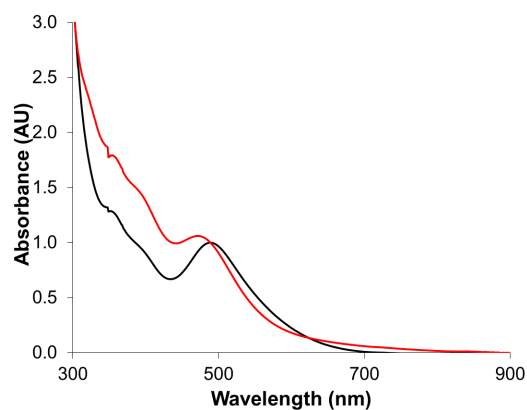

**Figure S3.** UV-Vis spectra of **1a** in CH<sub>2</sub>Cl<sub>2</sub> (red) and CH<sub>3</sub>CN (black) at 24 °C.

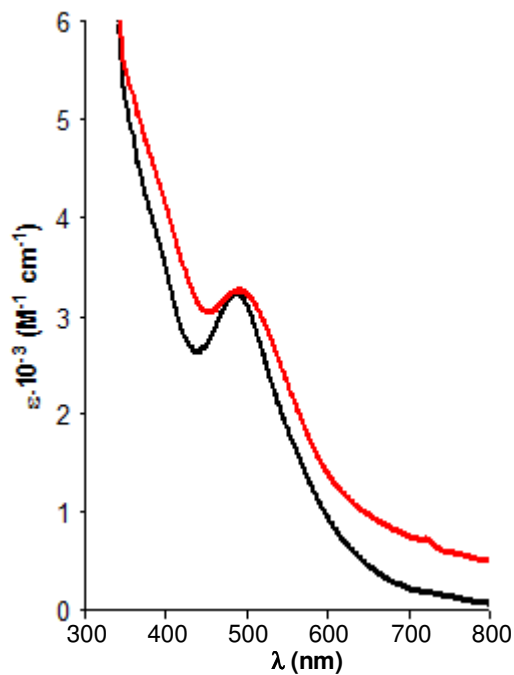

**Figure S4.** UV-Vis spectra of **1b** in CH<sub>2</sub>Cl<sub>2</sub> (red) and CH<sub>3</sub>CN (black) at 24 °C.

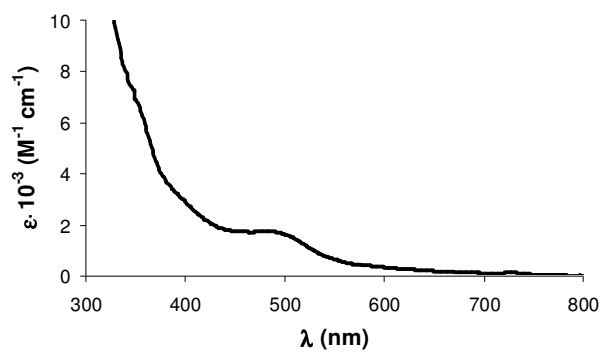

**Figure S5.** UV-Vis spectrum of **2** in CH<sub>3</sub>CN at 24 °C.

Submitted to *Dalton Trans.*

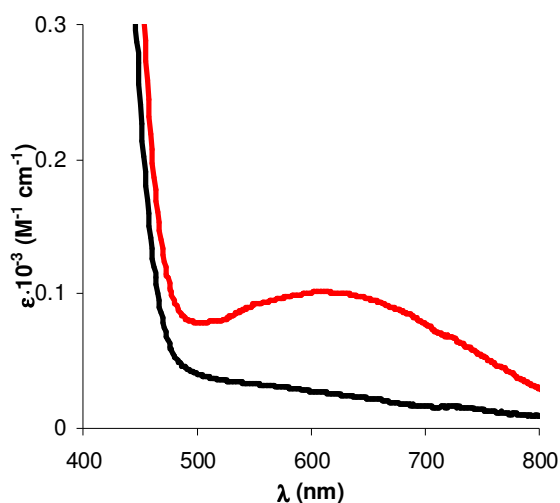

**Figure S6.** Electronic absorption spectra (visible region) of [Cp<sub>2</sub>Co][V(CO)<sub>6</sub>] in CH<sub>2</sub>Cl<sub>2</sub> (red) and CH<sub>3</sub>CN (black) at 24 °C. The vanadium-to-cobalt contact ion pair charge transfer occurs at λ<sub>max</sub> = 620 nm in CH<sub>2</sub>Cl<sub>2</sub>.<sup>21</sup>

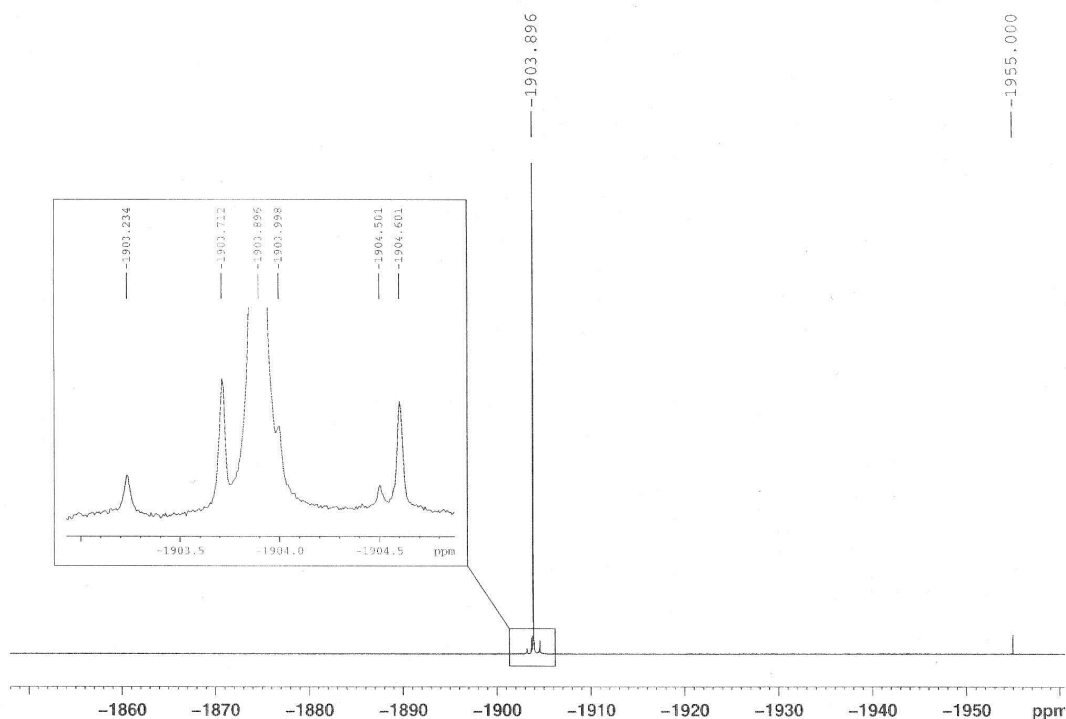

**Figure S7.** <sup>51</sup>V NMR (131.6 MHz, CD<sub>3</sub>CN, 25 °C) spectrum of **1a** in CD<sub>3</sub>CN at 25 °C referenced to neat VOCl<sub>3</sub>. A very small peak at -1955.0 ppm corresponds to trace contamination of the sample with [Et<sub>4</sub>N][V(CO)<sub>6</sub>], which is a common and persistent impurity associated with photolytic substitution reactions of [Et<sub>4</sub>N][V(CO)<sub>6</sub>].

Submitted to *Dalton Trans.*

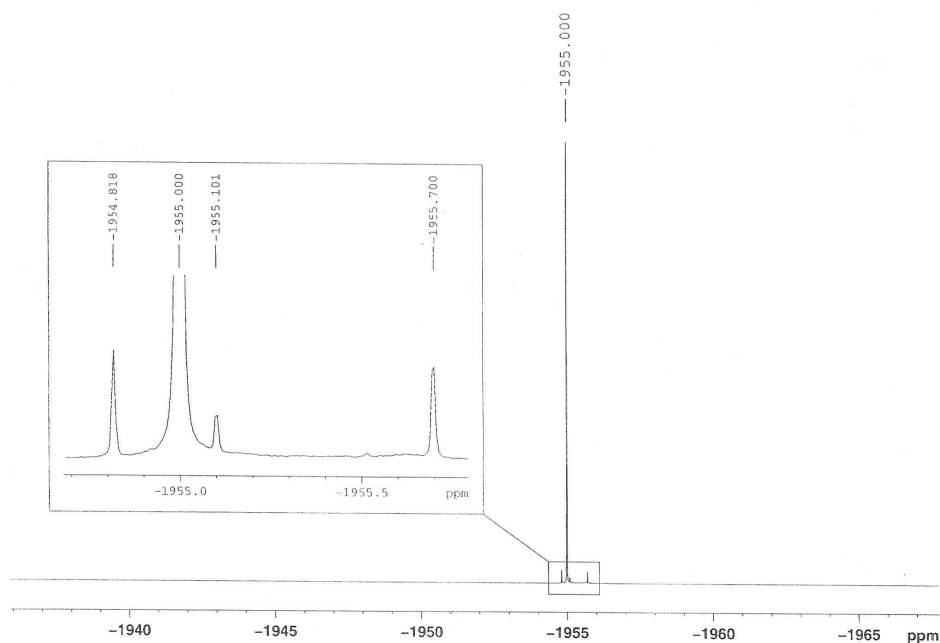

**Figure S8.**  $^{51}\text{V}$  NMR (131.6 MHz,  $\text{CD}_3\text{CN}$ ,  $25^\circ\text{C}$ ) spectrum of  $[\text{Et}_4\text{N}][\text{V}(\text{CO})_6]$  in  $\text{CD}_3\text{CN}$  at  $25^\circ\text{C}$  referenced to neat  $\text{VOCl}_3$ .

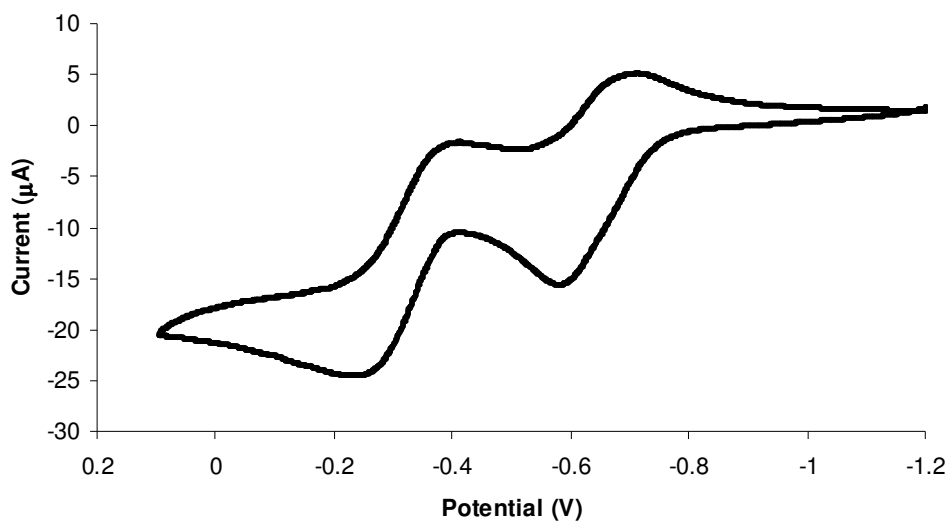

**Figure S9.** Cyclic voltammogram for **1a** in  $\text{CH}_3\text{CN}$  at  $22^\circ\text{C}$  at  $100\text{ mV/s}$ . Potentials are referenced to the  $\text{Cp}_2\text{Fe}^{0/+}$  couple.

Submitted to *Dalton Trans.*

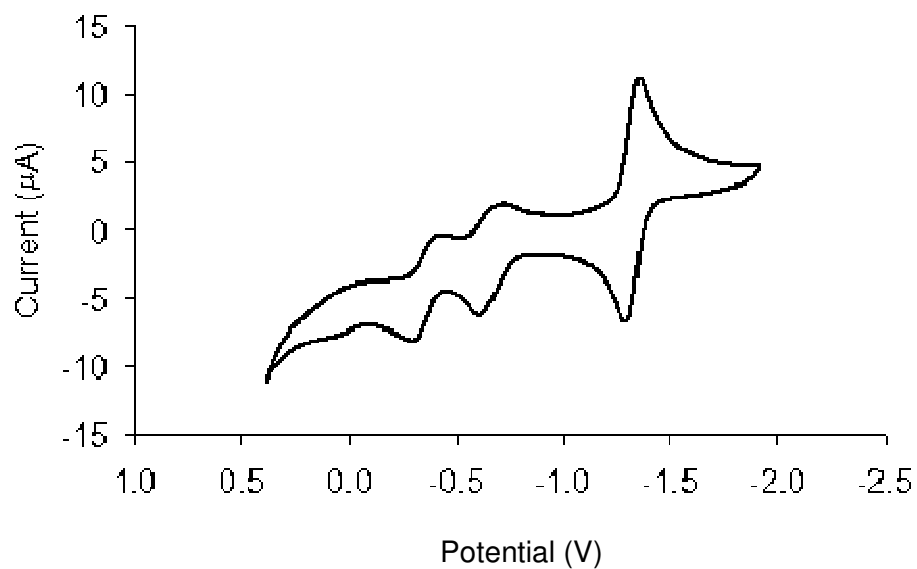

**Figure S10.** Cyclic voltammogram for **1b** in CH<sub>3</sub>CN at 22 °C at 100 mV/s. Potentials are referenced to the Cp<sub>2</sub>Fe<sup>0/+</sup> couple.

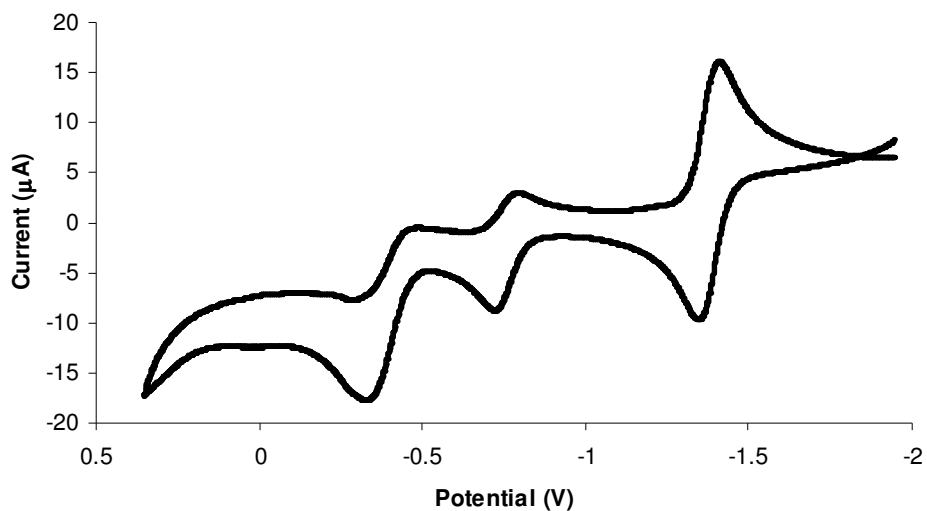

**Figure S11.** Cyclic voltammogram for **2** in CH<sub>3</sub>CN at 22 °C at 100 mV/s. Potentials are referenced to the Cp<sub>2</sub>Fe<sup>0/+</sup> couple.

Submitted to *Dalton Trans.*

## E. REFERENCES

1. N. G. Connelly and W. Geiger, *Chem. Rev.*, 1996, **96**, 877.
2. M. V. Barybin, M. K. Pomije, and J. E. Ellis, *Inorg. Chim. Acta*, 1998, **269**, 58.
3. F. Calderazzo, G. Pampaloni, and P. F. Zanazzi, *Chem. Ber.*, 1986, **119**, 2796.
4. X. Liu, and J. E. Ellis, *Inorg. Synth.*, 2004, **34**, 96.
5. F. A. Cotton, L. M. Daniels and C. C. Wilkinson, *Acta Cryst. E*, 2001, **57**, m529.
6. S. A. Swanson, R. McClain, K. S. Lovejoy, N. B. Alamdari, J. S. Hamilton and J. C. Scott, *Langmuir*, 2005, **21**, 5034.
7. I. Ugi, U. Fetzer, U. Eholzer, H. Knupfer and K. Offermann, *Angew. Chem., Int. Ed. Engl.*, 1965, **4**, 472.
8. K. Ihmels and D. Rehder, *J. Organomet. Chem.*, 1983, **232**, 151.
9. Data Collection: SMART Software Reference Manual, 1998. Bruker-AXS, 5465 E. Cheryl Parkway, Madison, WI 53711-5373, USA.
10. Data Reduction: SAINT Software Reference Manual, 1998. Bruker-AXS, 5465 E. Cheryl Parkway, Madison, WI 53711-5373, USA.
11. G. M. Sheldrick, 2002. SADABS. Program for Empirical Absorption Correction of Area Detector Data. University of Göttingen, Germany.
12. (a) G. M. Sheldrick, 2000. SHELXTL Version 6.10 Reference Manual. Bruker-AXS, 5465 E. Cheryl Parkway, Madison, WI 53711-5373 USA. (b) *International Tables for Crystallography, Vol C*, Tables 6.1.1.4, 4.2.6.8, and 4.2.4.2, Kluwer: Boston, 1995.
13. P. Van der Sluis and A. L. Spek, *Acta Cryst. A*, 1990, **46**, 194.
14. M. N. Burnett and C. K. Johnson, ORTEP-III: Oak Ridge Thermal Ellipsoid Plot Program for Crystal Structure Illustrations, Oak Ridge National Laboratory Report ORNL-6895, 1996.
15. F. Neese, ORCA – an ab initio, Density Functional and Semiempirical Program Package, Version 2.8.0, University of Bonn, 2011.
16. (a) A. D. Becke, *J. Chem. Phys.*, 1986, **84**, 4524. (b) J. P. Perdew, *Physical Review B*, 1986, **33**, 8822.
17. (a) A. Schäfer, H. Horn and R. Ahlrichs, *J. Chem. Phys.*, 1992, **97**, 2571. (b) A. Schäfer, C. Huber and R. Ahlrichs, *J. Chem. Phys.*, 1994, **100**, 5829.
18. F. Neese, *J. Comput. Chem.*, 2003, **24**, 1740.
19. (a) A. D. Becke, *J. Chem. Phys.*, 1993, **98**, 5648. (b) A. D. Becke, *J. Chem. Phys.*, 1993, **98**, 1372. (c) C. Lee, W. Yang and R. G. Parr, *Phys. Rev. B*, 1988, **37**, 785.
20. S. Portmann and H. P. Luthi, MOLEKEL: An Interactive Molecular Graphics Tool. CHIMIA, 2000, **54**, 766.
21. This electronic spectrum compares well to that originally reported by Kochi and Bockman for  $[\text{Cp}_2\text{Co}][\text{V}(\text{CO})_6]$ : J. K. Kochi and T. M. Bockman, *J. Am. Chem. Soc.*, 1989, **111**, 4669.
